# Supplementary material
Source: publisher figshare collection journal article supplement (https://acs.figshare.com/ndownloader/files/3907849)
Supplement: Supplementary file 1 [file 3907849]

# Supporting Information

## Construction and modelling of concatemeric DNA multilayers on a planar surface as monitored by QCM-D and SPR

Lu Sun<sup>1</sup>, Sofia Svedhem<sup>2</sup>, Björn Åkerman<sup>1\*</sup>

<sup>1</sup>Department of Chemical and Biological Engineering, Chalmers University of Technology, 412 96 Gothenburg, Sweden

<sup>2</sup>Department of Applied Physics, Chalmers University of Technology, 412 96 Gothenburg, Sweden

\*Corresponding author baa@chalmers.se

Keywords: DNA concatemers, surface assembly, QCM-D, SPR, Voigt modeling

### 1. Base sequences of Oligonucleotides.

**Table 1.** Oligonucleotides for assembly of concatemers.

| Name               | No of bases | Oligonucleotide sequence from 5' to 3'                      |
|--------------------|-------------|-------------------------------------------------------------|
| b-AB <sub>59</sub> | 59          | TTTTTGATCTCTCGGACTAACCCTGAGGTCAGCGCCAGTGAGAGTGCTGCATTCACGGT |
| A' <sub>34</sub>   | 34          | CGCTGACCTCAGGGTTAGTCCGAGAGATCAAAAA                          |
| A'B'               | 50          | CGCTGACCTCAGGGTTAGTCCGAGAACCGTGAATGCAGCACTCTCACTGG          |
| AB                 | 50          | TCTCGGACTAACCCTGAGGTCAGCGCCAGTGAGAGTGCTGCATTCACGGT          |
| A                  | 25          | TCTCGGACTAACCCTGAGGTCAGCG                                   |

### 2. Effective shear elastic modulus ( $\mu$ ) for single DNA layer using the extended (frequency-dependent) Voigt model, based on the fits shown in Figure 3 of main text.

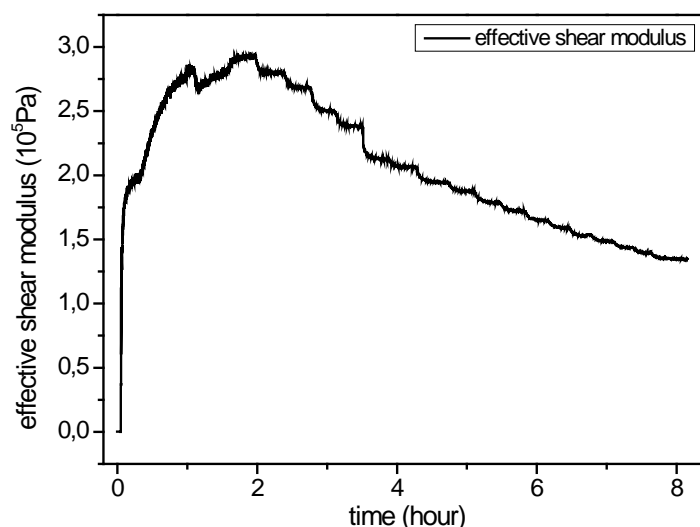

Figure S1. Effective shear modulus during the step-wise assembly of a 534bp concatemer film, obtained by Voigt-based modeling using a single DNA layer with frequency-dependent viscoelastic parameters.

### 3. Fit of experimental data to a two-layer Voigt model.

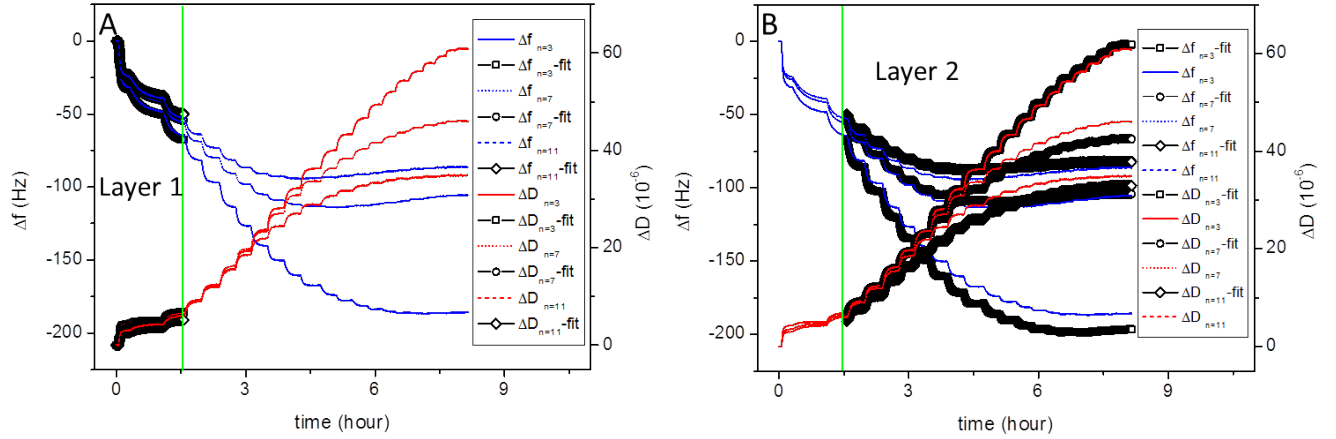

Figure S1. Experiment data (lines) and two layer Voigt-based modeling (lines + symbols) on the changes in frequency ( $\Delta f$ ) and dissipation ( $\Delta D$ ) versus time for stepwise assembly of a 534 bp ds DNA concatemer layer, at overtone  $n=3$  (solid, solid+squares),  $n=7$  (dotted, dotted+circles) and  $n=11$  (dashed, dashed+triangles). (A) The first three hybridization steps modeled as layer 1. (B) The subsequent steps modeled as layer 2.

### 4. QCM-D data for 534bp concatemers assembled in high salt PBS buffer (5mM $\text{NaH}_2\text{PO}_4$ , 5mM $\text{Na}_2\text{HPO}_4$ , 537 mM NaCl, 127KCl, pH 7.4) solution and the Voigt-modeled viscoelastic properties.

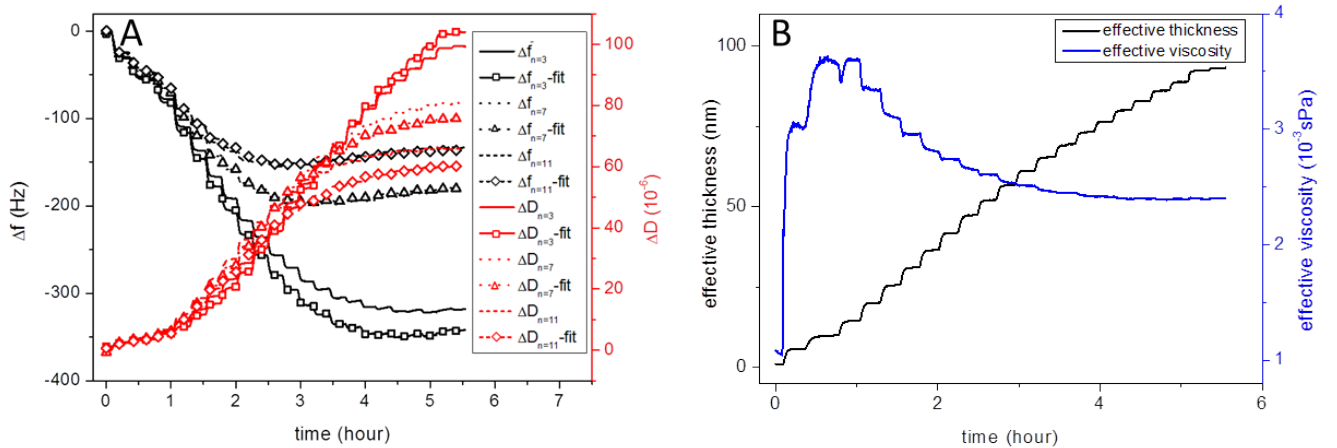

Figure S3. (A) Experiment data (lines) and Voigt-model (lines + symbols) on the changes in frequency ( $\Delta f$ ) and dissipation ( $\Delta D$ ) versus time for stepwise assembly of a 534 bp ds DNA concatemer layer in 10mM PBS buffer (537 mM NaCl, 127KCl, pH 7.4), at overtone  $n=3$  (solid, solid + squares),  $n=7$  (dotted, dotted + circles) and  $n=11$  (dashed, dashed + triangles). (B) Changes in effective thickness (black; left axis) and effective shear viscosity (blue; right axis) versus time during the step-wise DNA-assembly as obtained from the Voigt-based modeling shown in A.

## 5. Standard Voigt-based modeling

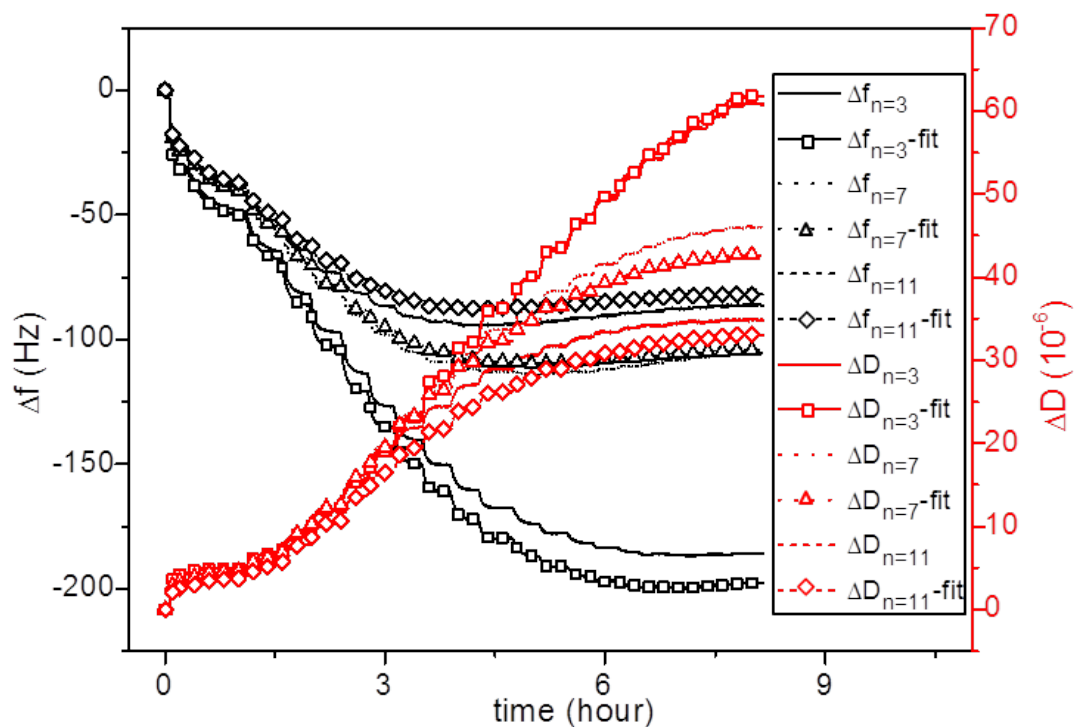

Figure S4. Experimental data and modeling results for a 534 bp DNA film using the standard Voigt model. (Lines) QCM-D data on changes in frequency ( $\Delta f$ ) and dissipation ( $\Delta D$ ) versus time at overtones  $n=3$  (solid), 7 (dotted) and 11 (dashed) during the 20 step oligonucleotide hybridization when the semi-complementary oligonucleotides A'B' (10 times) and AB (9 times) are hybridized to the platform in Figure 1. The zero levels for  $\Delta f$  and  $\Delta D$  correspond to a fully formed SA layer (Figure 1). (Lines + symbols) Voigt-based modeling for overtones  $n=3$  (squares),  $n=7$  (triangles) and  $n=11$  (diamonds) using the standard model of a single-layer film with frequency-independent viscoelastic parameters.
